# Supplementary material for: The nanoscaled metal-organic framework ICR-2 as a carrier of porphyrins for photodynamic therapy
Source: PubMed Central journal article supplement (PMC6278752; doi:10.3762/bjnano.9.275), 2018-11-30
Supplement: Beilstein_J_Nanotechnol-09-2960-s001.pdf [file Beilstein_J_Nanotechnol-09-2960-s001.pdf]

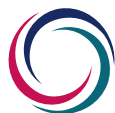

## Supporting Information

for

### **The nanoscaled metal-organic framework ICR-2 as a carrier of porphyrins for photodynamic therapy**

Jan Hynek, Sebastian Jurík, Martina Koncošová, Jaroslav Zelenka, Ivana Křížová,  
Tomáš Ruml, Kaplan Kirakci, Ivo Jakubec, František Kovanda, Kamil Lang  
and Jan Demel

*Beilstein J. Nanotechnol.* **2018**, *9*, 2960–2967. [doi:10.3762/bjnano.9.275](https://doi.org/10.3762/bjnano.9.275)

## Additional experimental data

## Contents

**Figure S1:** Powder XRD patterns of ICR-2 and UiO-66 treated in PBS for 4 h.

**Figure S2:** TEM image of nanoparticles prepared at 120°C.

**Figure S3:** Particle size distribution by number of aqueous dispersions of nanoICR-2 and nanoICR-2/porphyrin samples.

**Figure S4:** Zeta potential distribution of water dispersions of nanoICR-2 and nanoICR-2/porphyrin samples.

**Figure S5:** Powder XRD patterns of parent nanoICR-2 and nanoICR-2/porphyrin samples.

**Figure S6:** UV–vis spectra of free TPPPi(Ph), nanoICR-2/TPPPi(Ph), nanoICR-2/TPPPi(Ph)<sup>1/2</sup> and nanoICR-2/TPPPi(Ph)<sup>1/4</sup>.

**Figure S7:** UV–vis spectra of free TPPPi(Me) and nanoICR-2/TPPPi(Me).

**Figure S8:** UV–vis spectra of free TPPPi(iPr) and nanoICR-2/TPPPi(iPr).

**Figure S9:** Normalized luminescence spectra of nanoICR-2/TPPPi(Me), nanoICR-2/TPPPi(iPr), and nanoICR-2/TPPPi(Ph) in EtOH solution.

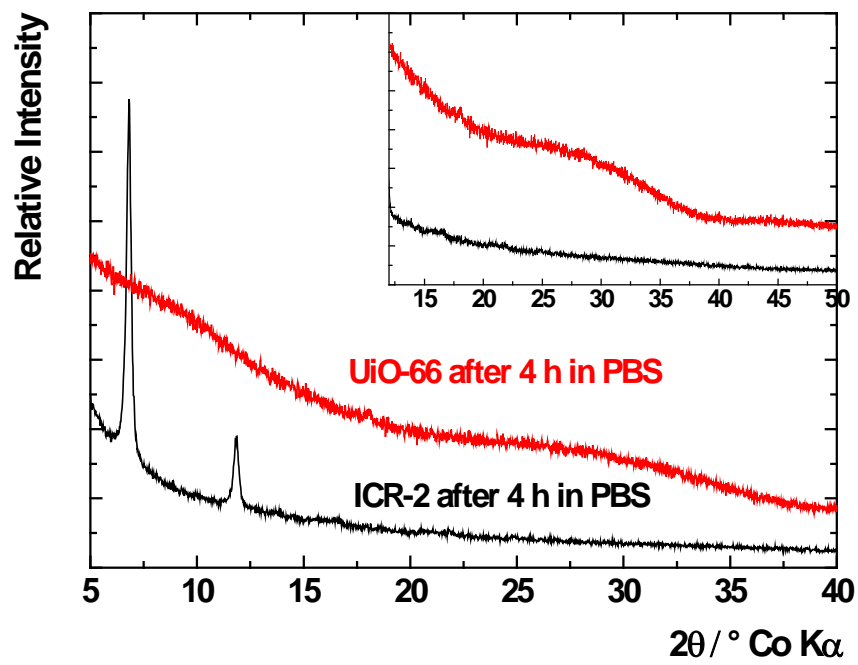

**Figure S1:** Powder XRD patterns of ICR-2 (black) and UiO-66 (red) both treated in PBS for 4 h.

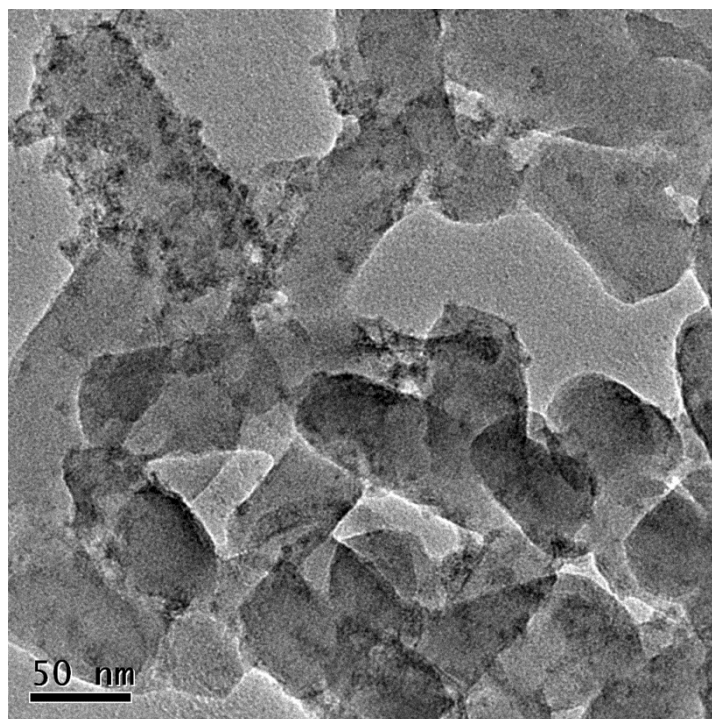

**Figure S2:** TEM image of nanoparticles prepared at 120 °C.

**A**

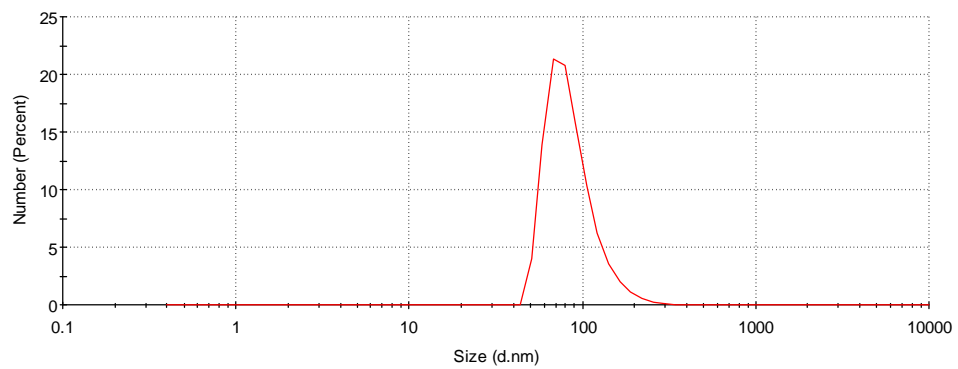

**B**

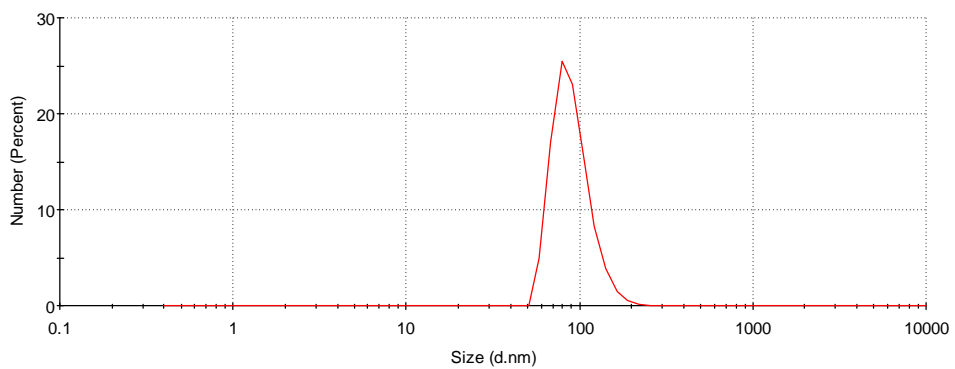

**C**

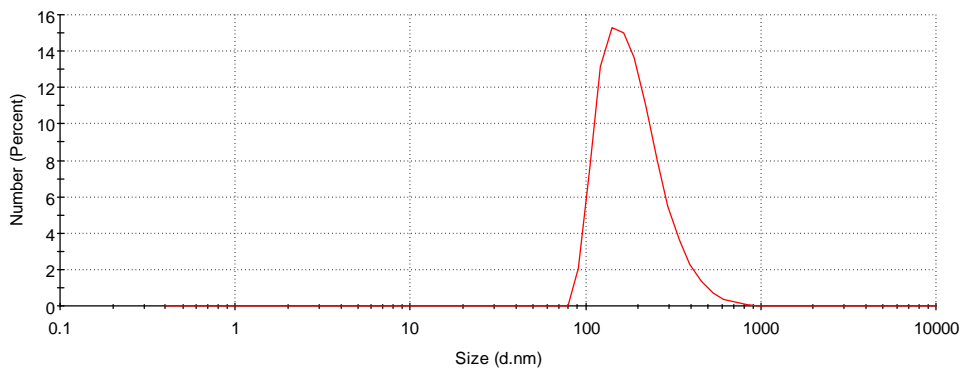

**D**

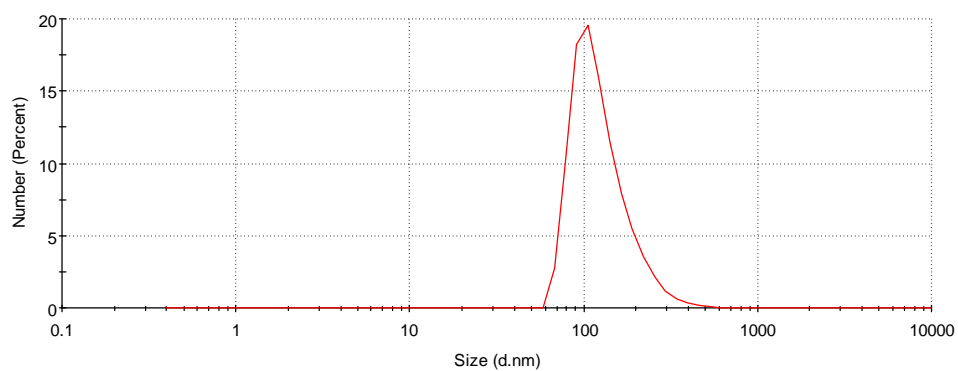

**E**

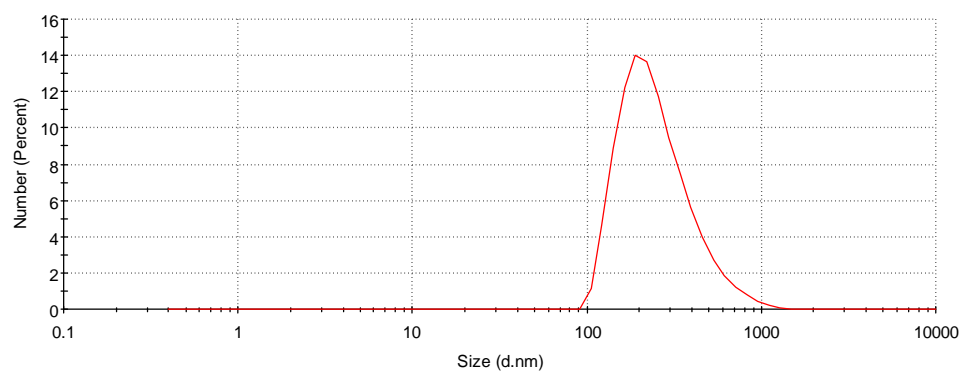

**F**

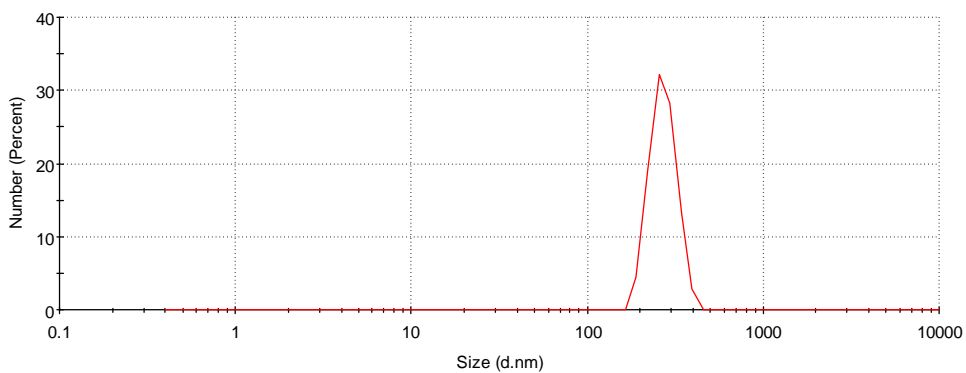

**Figure S3:** Particle size distribution by number of aqueous dispersions of nanoICR-2 (A), nanoICR-2/TPPPi(Me) (B), nanoICR-2/TPPPi(iPr) (C), nanoICR-2/TPPPi(Ph) (D), nanoICR-2/TPPPi(Ph)<sup>1/2</sup> (E), and nanoICR-2/TPPPi(Ph)<sup>1/4</sup> (F).

**A**

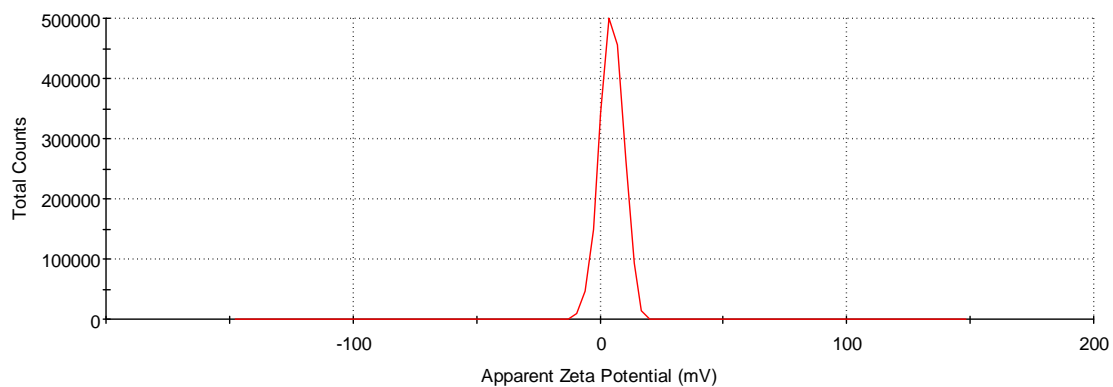

**B**

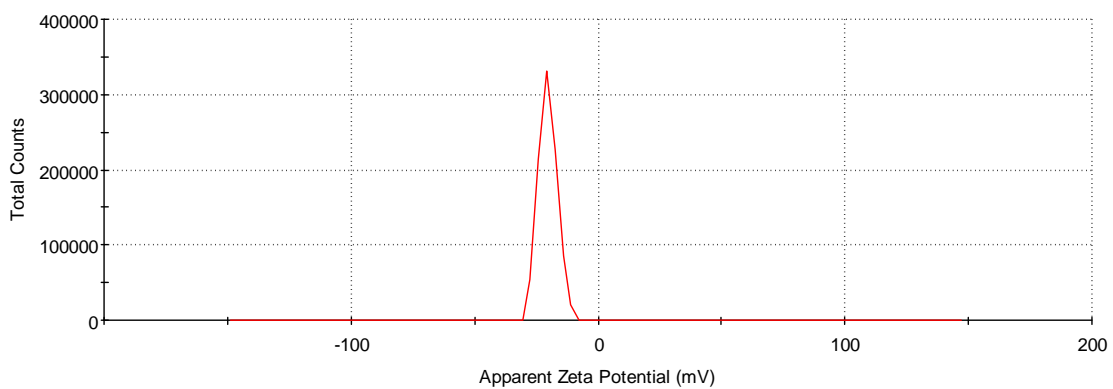

**C**

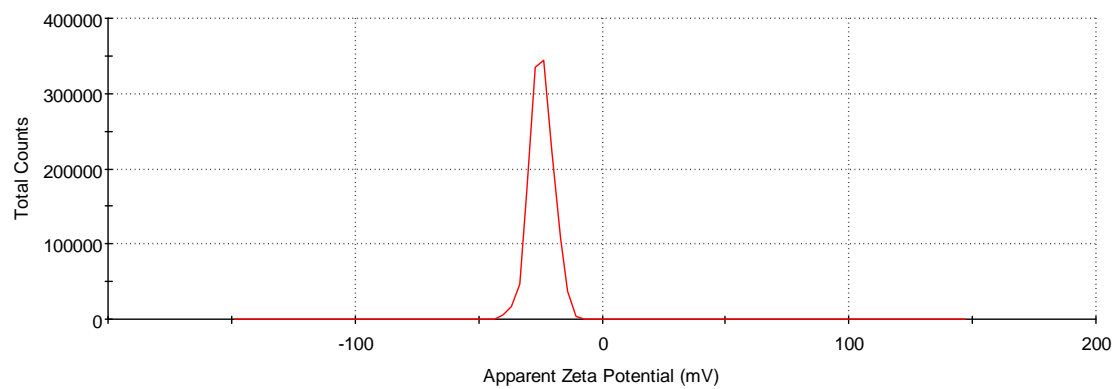

**D**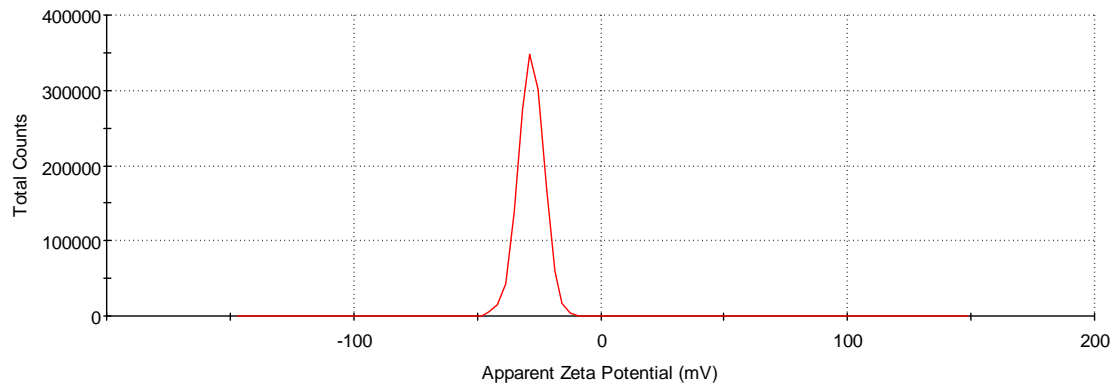**E**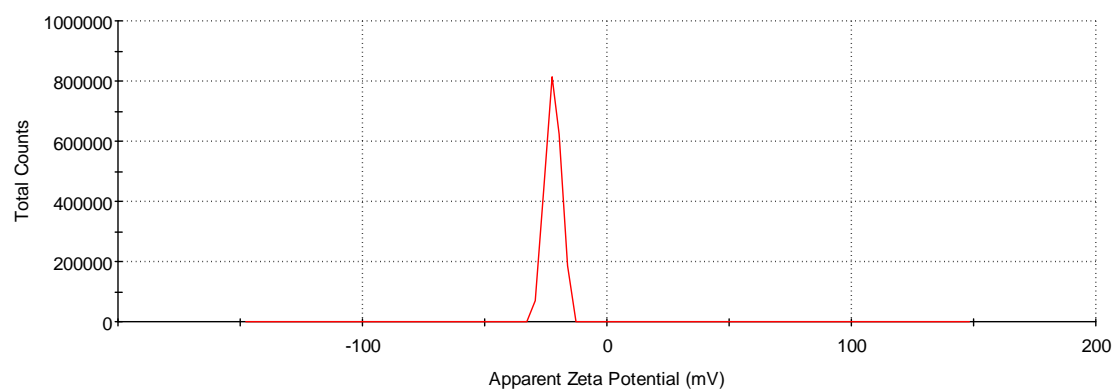**F**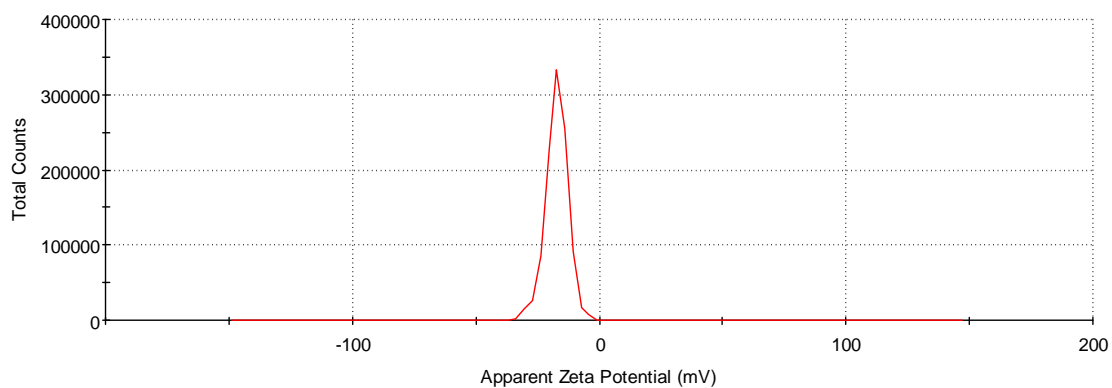

**Figure S4:** Zeta potential distribution of water dispersions of nanoICR-2 (A), nanoICR-2/TPPPi(Me) (B), nanoICR-2/TPPPi(iPr) (C), nanoICR-2/TPPPi(Ph) (D), nanoICR-2/TPPPi(Ph)<sup>1/2</sup> (E), and nanoICR-2/TPPPi(Ph)<sup>1/4</sup> (F).



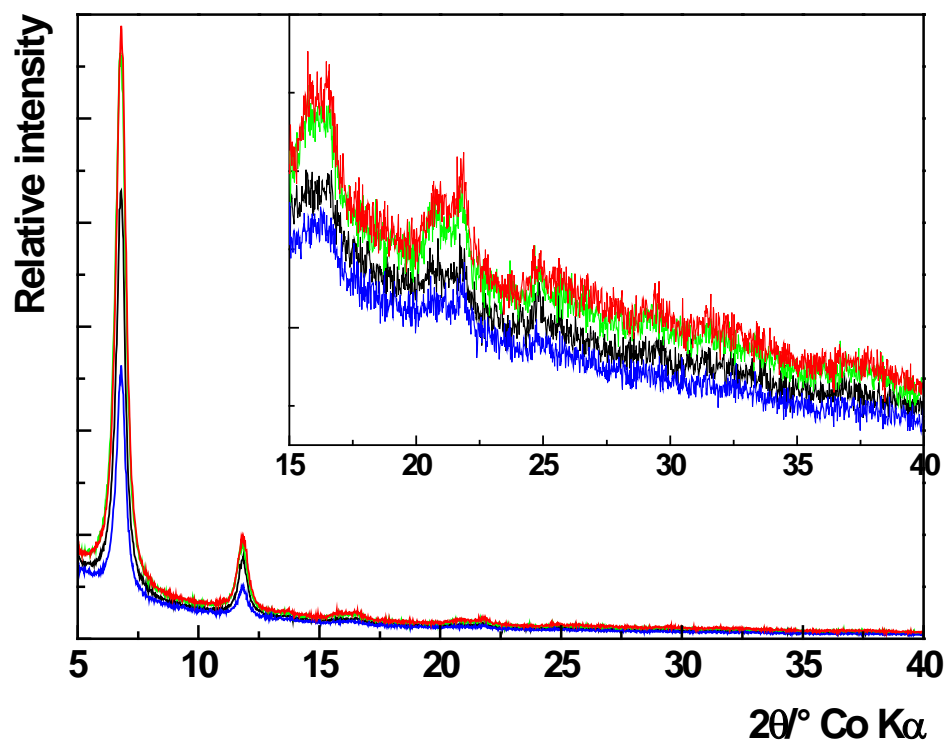

**Figure S5:** Powder XRD patterns of parent nanoICR-2 (black), nanoICR-2/TPPPi(Me) (green), nanoICR-2/TPPPi(iPr) (blue) and nanoICR-2/TPPPi(Ph) (red).

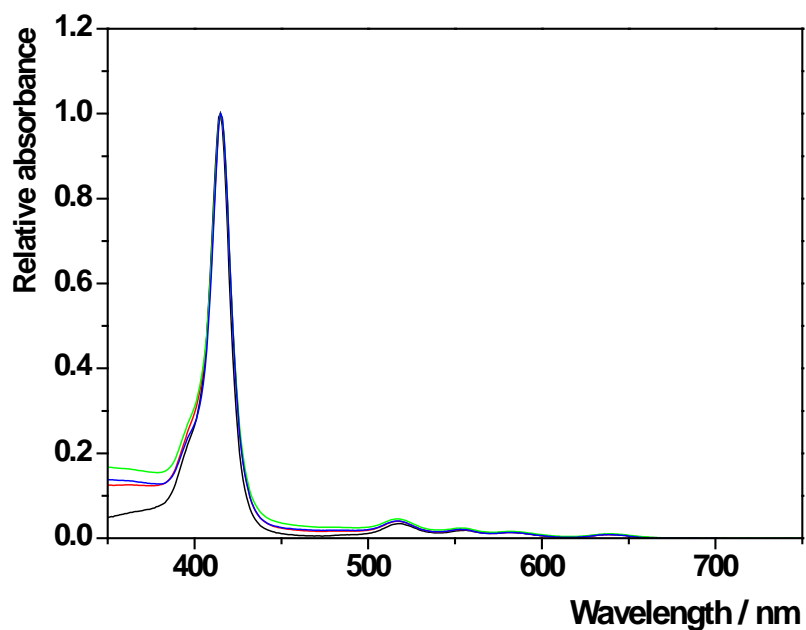

**Figure S6:** UV-vis spectra of free TPPi(Ph) (black), nanoICR-2/TPPi(Ph) (red), nanoICR-2/TPPi(Ph)<sup>1/2</sup> (blue) and nanoICR-2/TPPi(Ph)<sup>1/4</sup> (green) in EtOH.

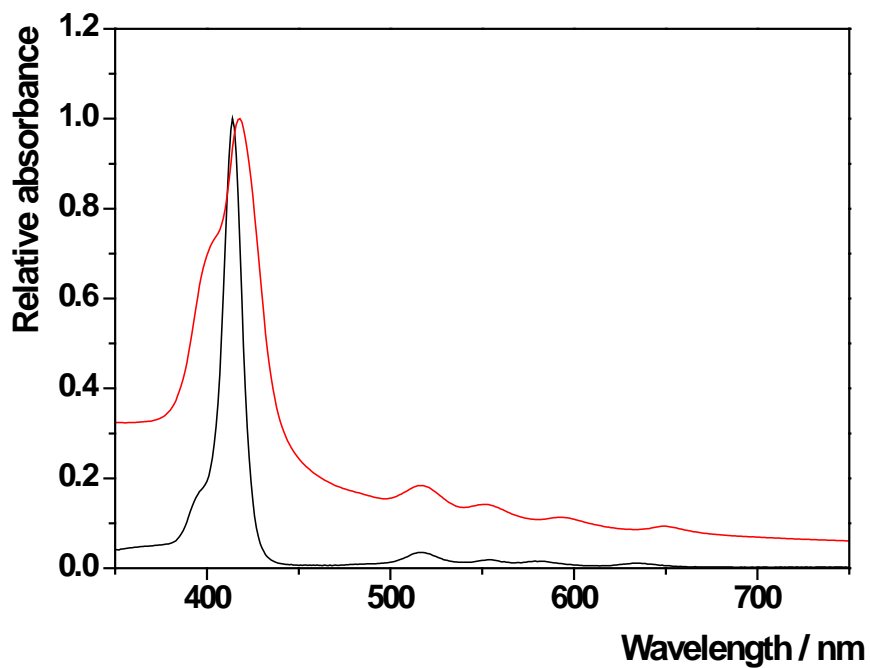

**Figure S7:** UV-vis spectra of free TPPi(Me) (black) and nanoICR-2/TPPi(Me) (red) in EtOH.

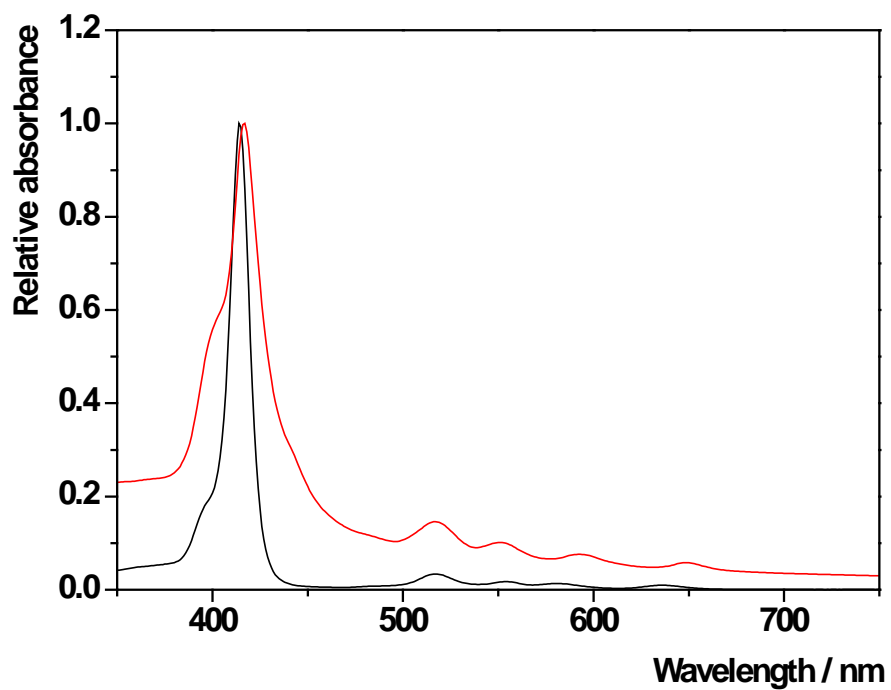

**Figure S8:** UV-vis spectra of free TPPi(iPr) (black) and nanoICR-2/TPPi(iPr) (red) in EtOH.

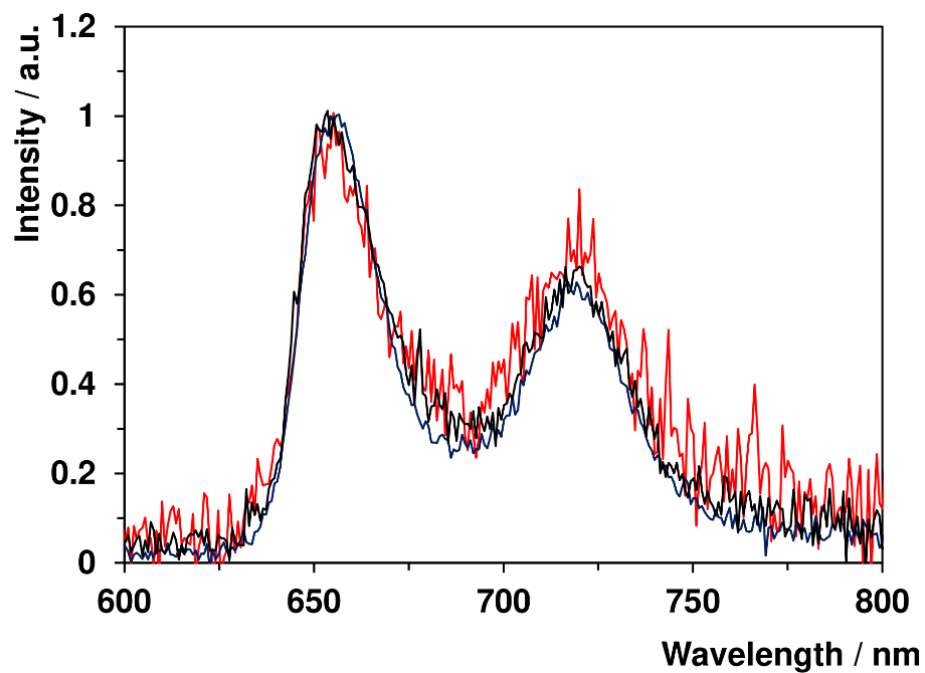

**Figure S9:** Normalized fluorescence spectra of nanoICR-2/TPPi(Me) (red), nanoICR-2/TPPi(iPr) (blue), and nanoICR-2/TPPi(Ph) (black) in EtOH solution.
